# Supplementary material for: Engineering of a self-supported carbon electrode with 2D ultrathin heterostructures of NiCo LDH/NiCoS via a MOF-template for sensitive detection of glucose and H2O2
Source: Royal Society of Chemistry journal article supplement (doi:10.1039/d2ma00454b), 2022-01-01
Supplement: d2ma00454b1.pdf [file d2ma00454b1.pdf]

## Supporting information

### Engineering of self-supported carbon electrode with 2D ultrathin heterostructure of NiCo LDH/NiCoS via a MOF-template for sensitive detection of glucose and H<sub>2</sub>O<sub>2</sub>

Lili Wang<sup>a\*</sup>, Jiahui Li<sup>a</sup>, Yibing Zhao<sup>b</sup>, Haojia He<sup>b</sup>, Linlin Zheng<sup>a</sup>, Zejia Huang<sup>b</sup>, Xu Zhao<sup>b</sup>, Junqing Xu<sup>c</sup>, Bing Wang<sup>a\*</sup> and Zhen Yin<sup>d\*</sup>

<sup>a</sup>State Key Laboratory of Separation Membranes and Membrane Processes, School of Chemistry, Tiangong University, Tianjin 300387, China.

<sup>b</sup>School of Chemical Engineering and Technology, Tiangong University, Tianjin 300387, China.

<sup>c</sup>China Tianchen Engineering Corporation, Tianjin 300400, China

<sup>d</sup>College of Chemical Engineering and Materials Science, Tianjin University of Science and Technology, Tianjin 300457, China.

E-mail: wanglili@tiangong.edu.cn (L. Wang); bingwang@tiangong.edu.cn (B. Wang); yinzhen@tust.edu.cn (Z. Yin)

**Preparation of NiCoS/CC:** 0.58 g Ni(NO<sub>3</sub>)<sub>2</sub>·6H<sub>2</sub>O, 1.16 g Co(NO<sub>3</sub>)<sub>2</sub>·6H<sub>2</sub>O, 0.17 g urea and 0.21 g NH<sub>4</sub>F were dissolved in 80 mL DI water and stirred for 10 min. Then a piece of CC (1 × 2 cm<sup>2</sup>) and the mixed solution were transferred to 100 mL autoclave and heated at 100°C for 6 h. The sample was rinsed with DI water and dried for 10 h. Finally, 6 mg TAA was dissolved in 40 mL ethanol and stirred. Then the mixed solution and a piece of sample were transferred to a 100 mL autoclave and heated at 120 °C for 4 h.

**Preparation of Co MOF/NiCoS/CC:** 0.58 g Ni(NO<sub>3</sub>)<sub>2</sub>·6H<sub>2</sub>O, 1.16 g Co(NO<sub>3</sub>)<sub>2</sub>·6H<sub>2</sub>O, 0.17 g urea and 0.21 g NH<sub>4</sub>F were dissolved in 80 mL DI water and stirred for 10 min. Then a piece of Co MOF (1 × 2 cm<sup>2</sup>) and the mixed solution were transferred to 100 mL autoclave and heated at 100°C for 6 h. The sample was rinsed with DI water and dried for 10 h. The sulfurization process is the same as above.

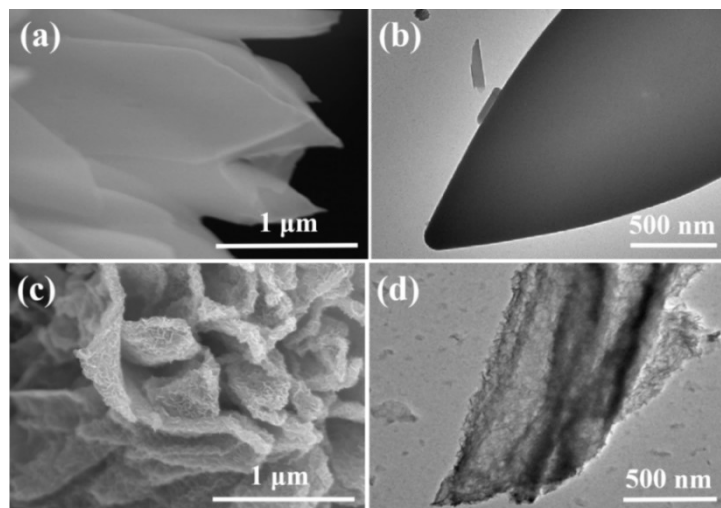

**Fig. S1** SEM and TEM images of obtained carbon electrodes with (a, b) Co MOF and (c, d) NiCo LDH.

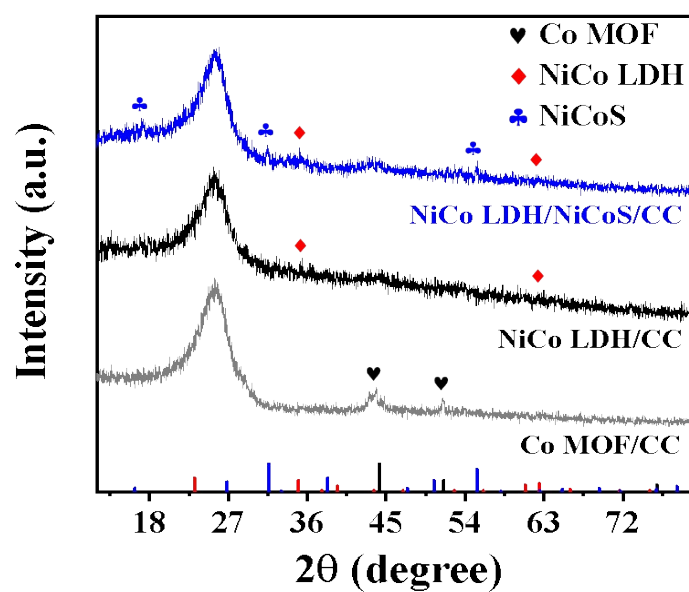

**Fig. S2** XRD patterns of obtained carbon electrodes with Co MOF, NiCo LDH and NiCo LDH/NiCoS

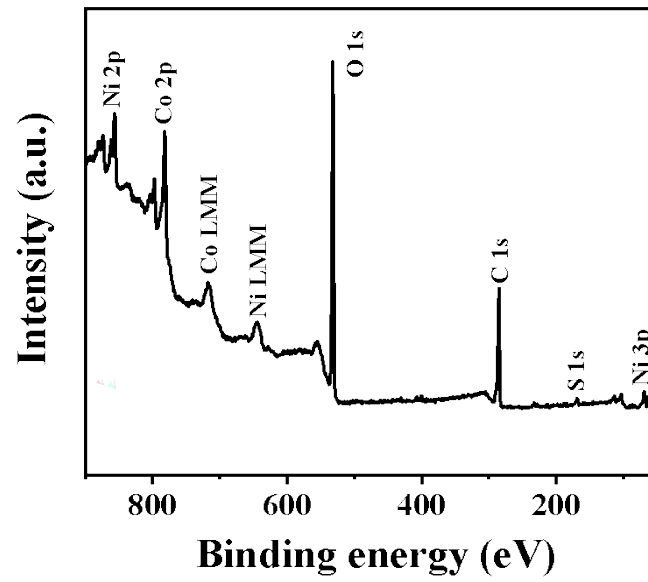

**Fig. S3** The full XPS spectra of obtained carbon electrode with NiCo LDH/NiCoS.

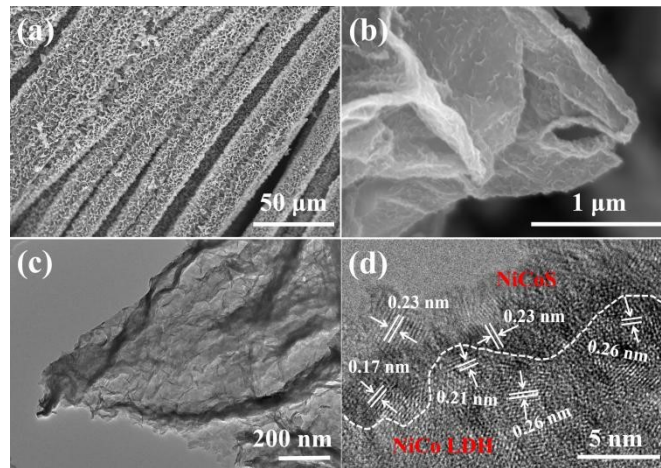

**Fig. S4** (a), (b) SEM, (c) TEM and (d) HR-TEM images of carbon electrode with NiCo LDH/NiCoS.

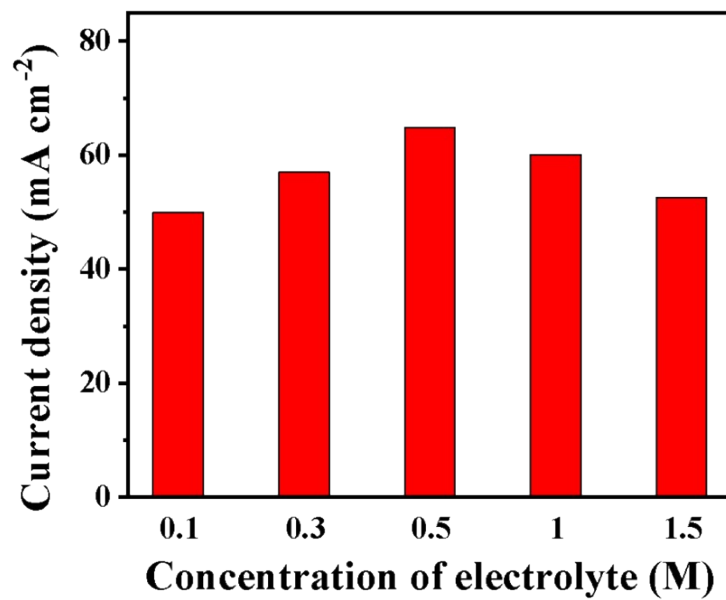

**Fig. S5** Peak current densities of the NiCo LDH/NiCoS/CC electrode towards glucose oxidation with different concentrations of NaOH.

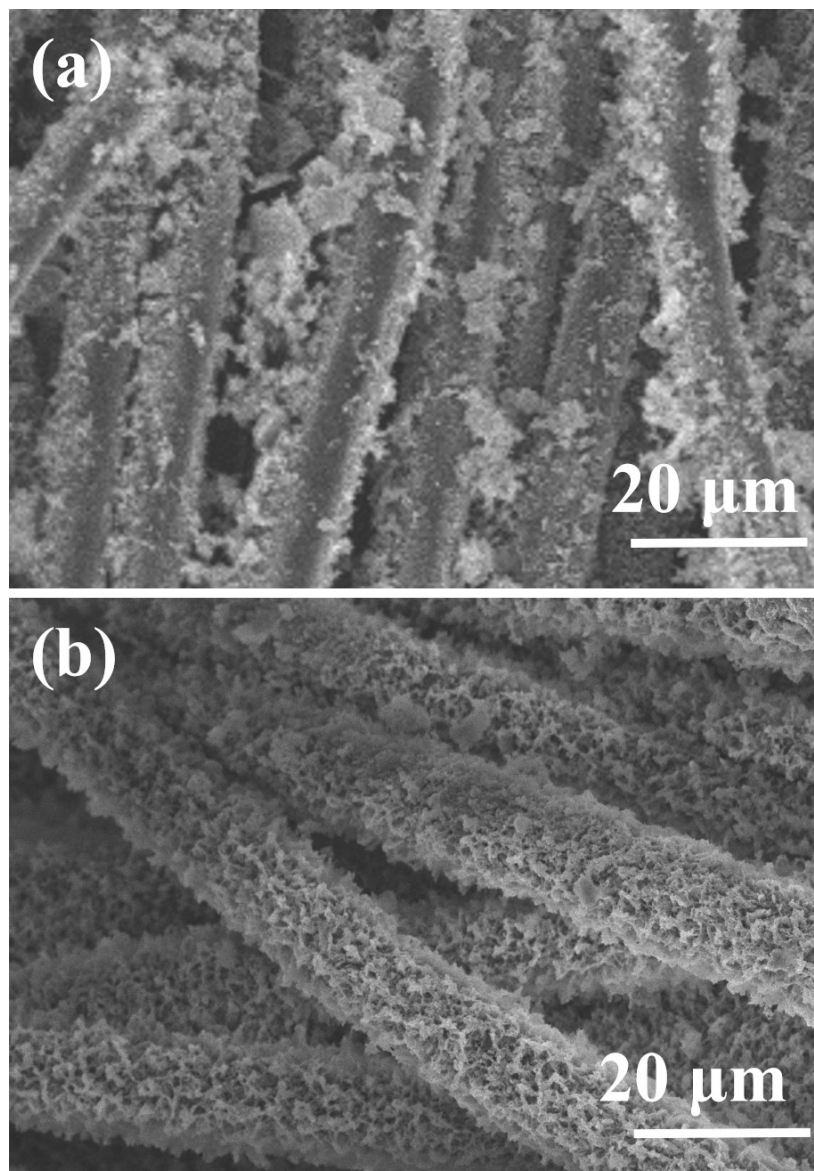

**Fig. S6** SEM images of (a) NiCoS/CC and (b) Co MOF/NiCoS/CC electrodes.

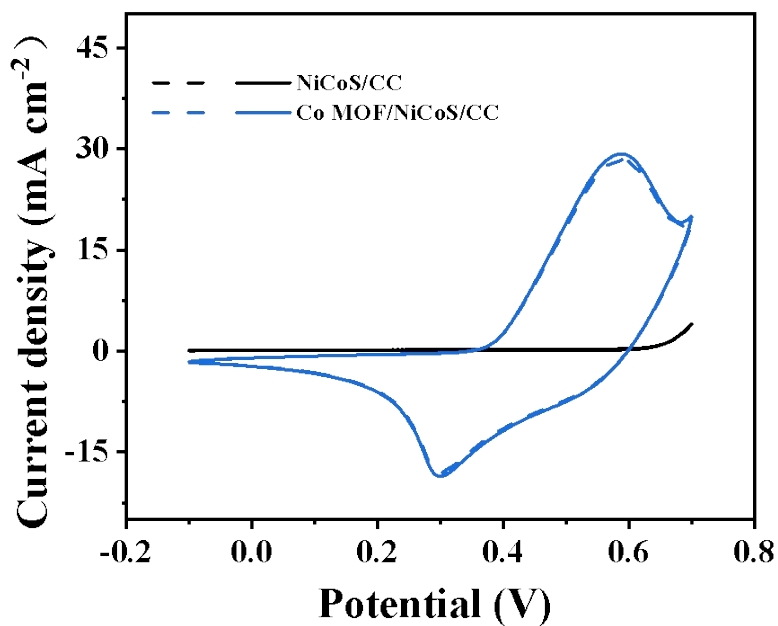

**Fig. S7** CV curves of obtained carbon electrodes with NiCoS and Co MOF/NiCoS in the presence (solid line) and absence (dashed line) of 1 mM glucose in 0.5 M NaOH at a scan rate of 20 mV s<sup>-1</sup>.

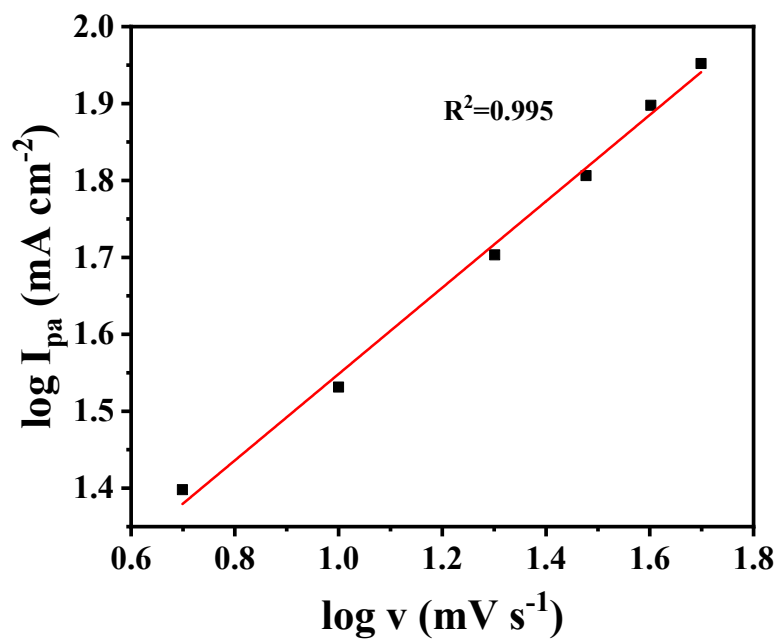

**Fig. S8** Plots of  $\log I_{pa}$  vs.  $\log v$ .

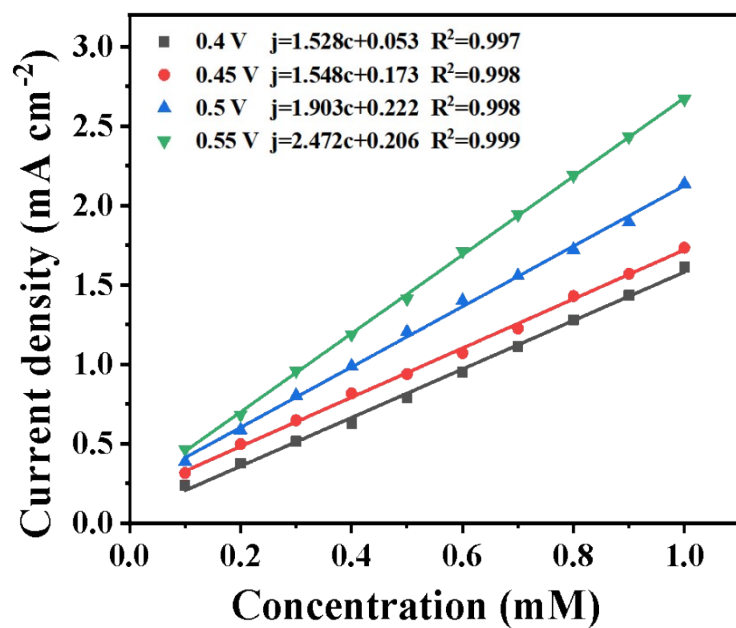

Fig. S9 Plots of concentration vs. current density of NiCo LDH/NiCoS/CC electrode.

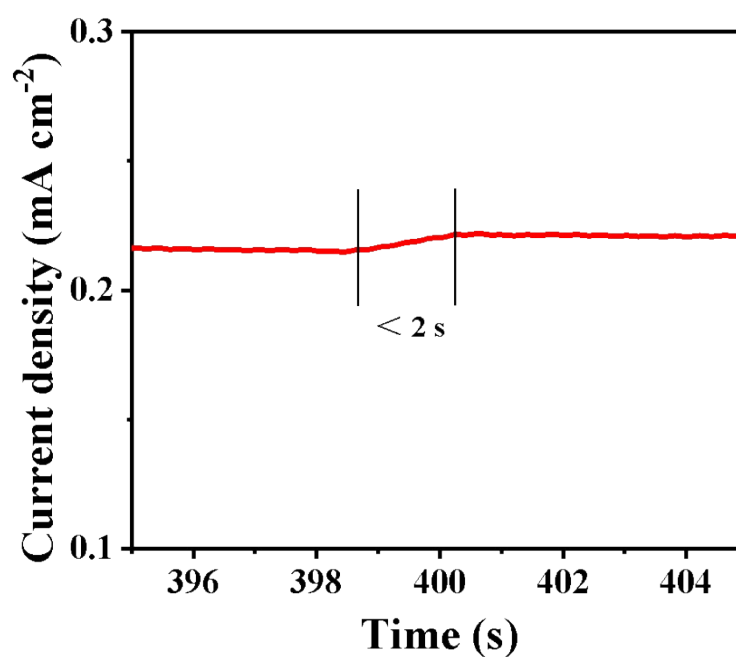

Fig. S10 Response time to glucose oxidation of NiCo LDH/NiCoS/CC electrode.

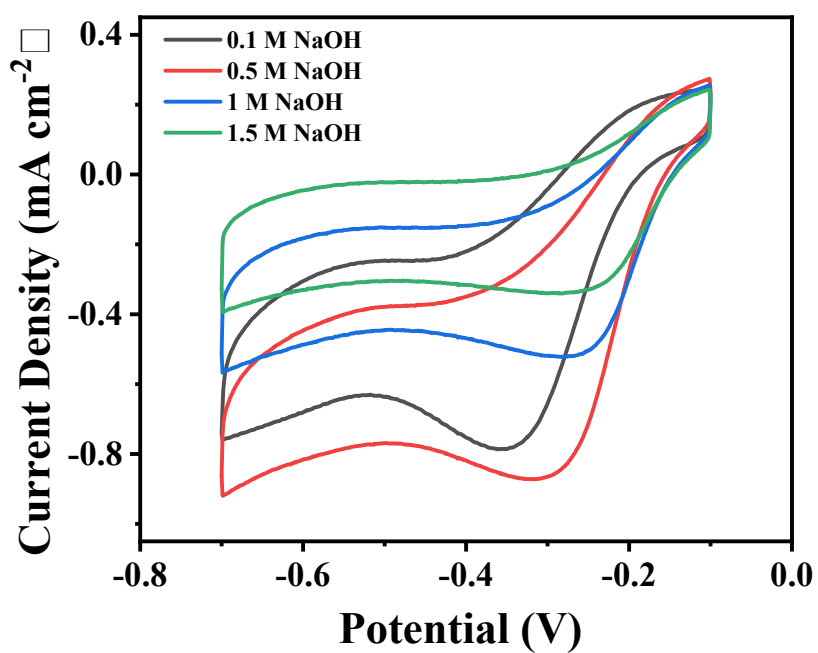

**Fig. S11** Sensitivity of the NiCo LDH/NiCoS/CC electrode towards 5 mM  $\text{H}_2\text{O}_2$  reduction in different NaOH concentrations.

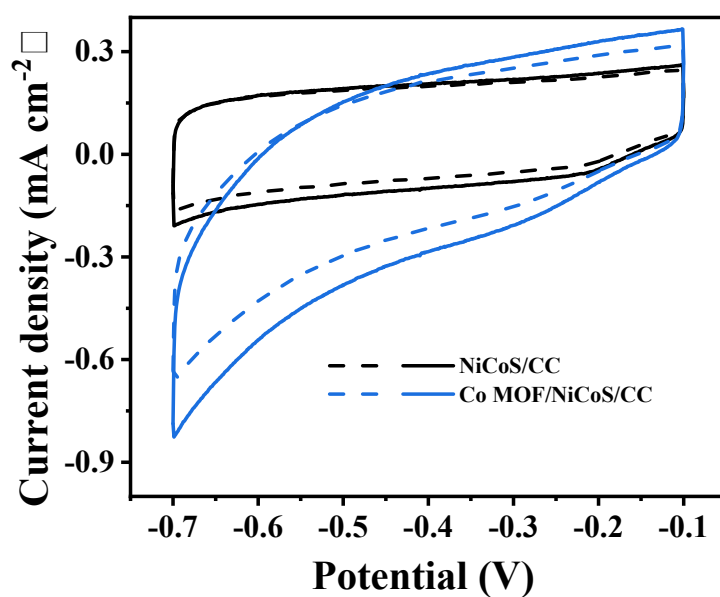

**Fig. S12** CV curves of obtained carbon electrodes with NiCoS and Co MOF/NiCoS in the presence (solid line) and absence (dashed line) of 1 mM  $\text{H}_2\text{O}_2$  in 0.5 M NaOH at a scan rate of  $50 \text{ mV s}^{-1}$ .



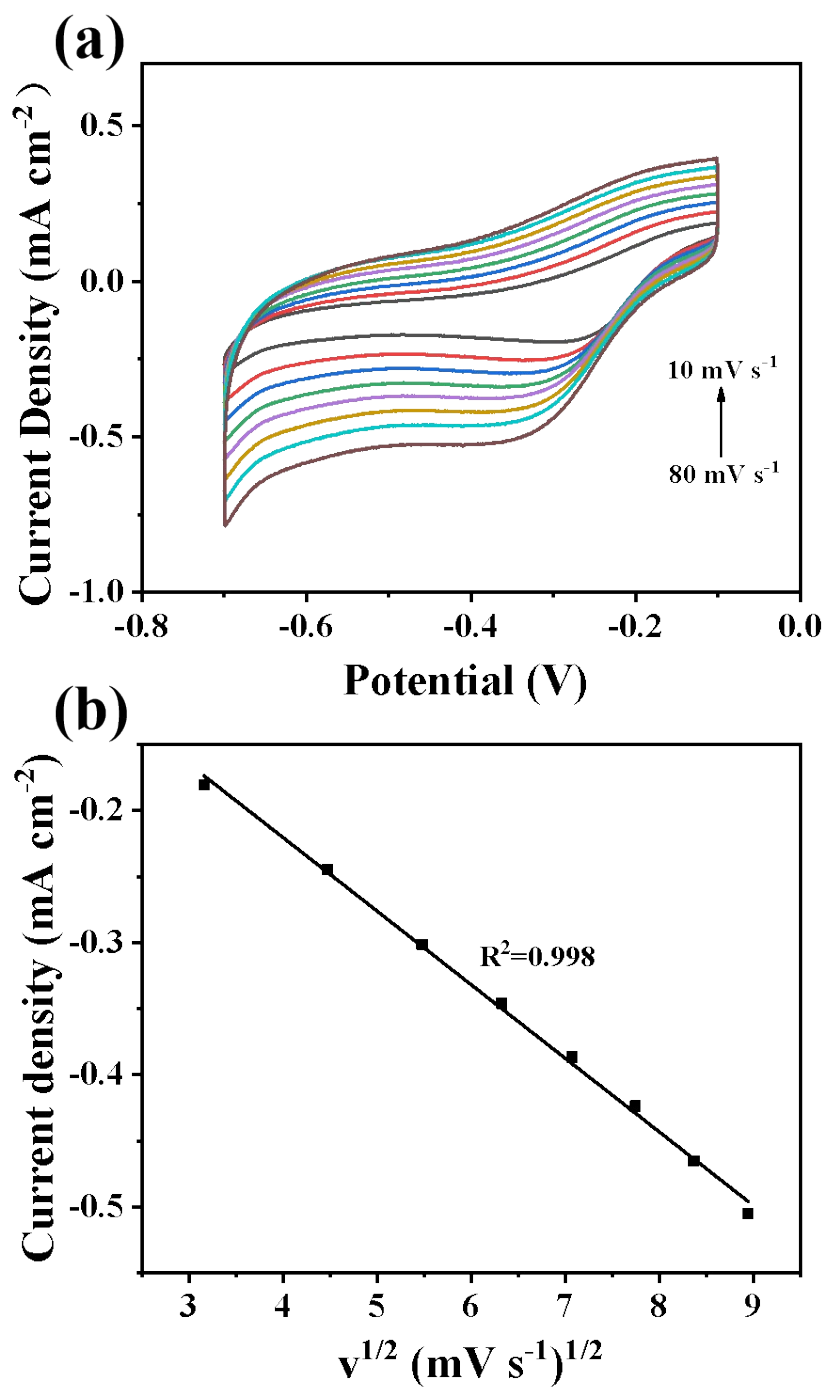

**Fig. S13** (a) CV curves of the NiCo LDH/NiCoS/CC electrode to 3 mM H<sub>2</sub>O<sub>2</sub> at different scan rates (10 to 80 mV s<sup>-1</sup>), (b) the fitting the linear relationship between the current density of the reduction peak vs.  $v^{1/2}$ .

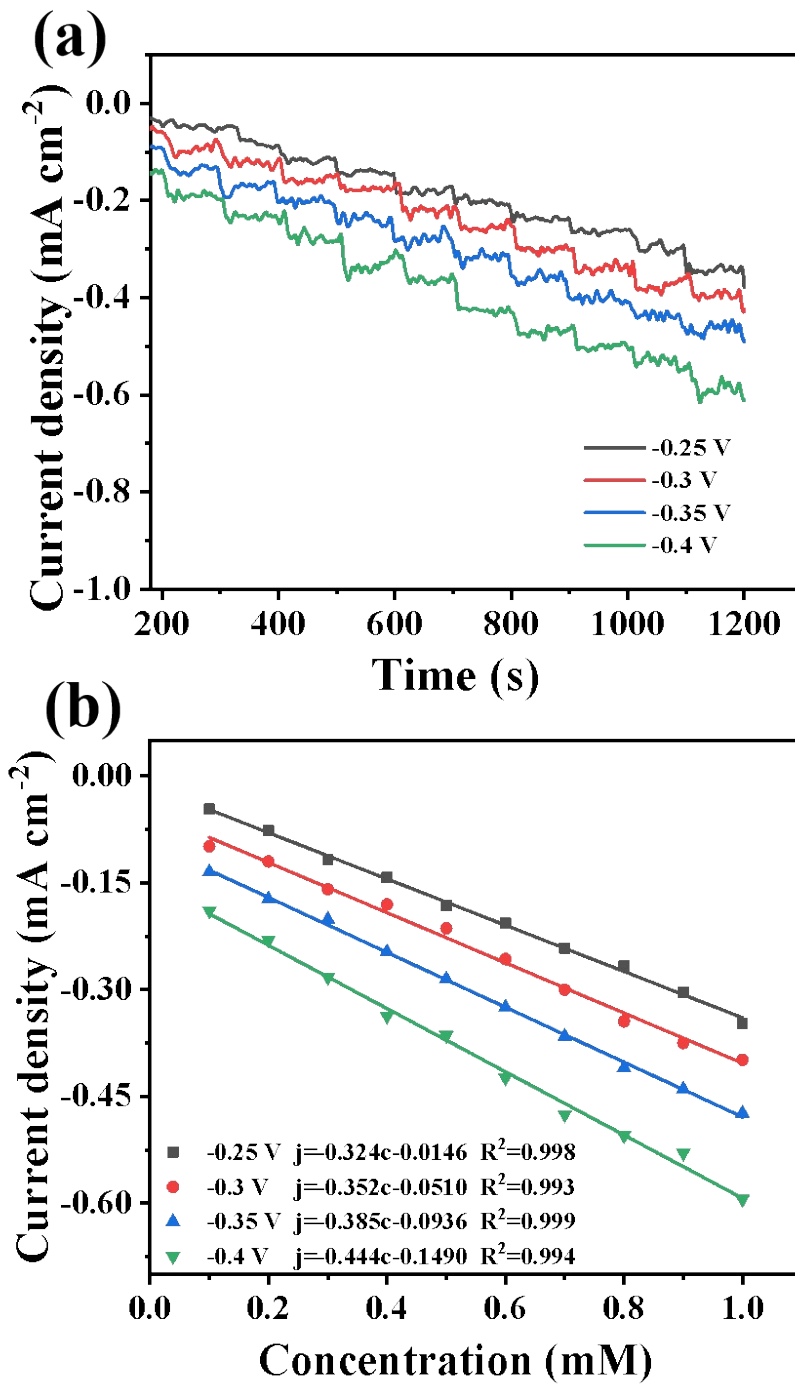

**Fig. S14** (a) Responses of  $\text{H}_2\text{O}_2$  reduction with the obtained NiCo LDH/NiCoS/CC electrodes at different applied potentials ( -0.25 V to -0.4 V) and (b) plots of concentration vs. current density.

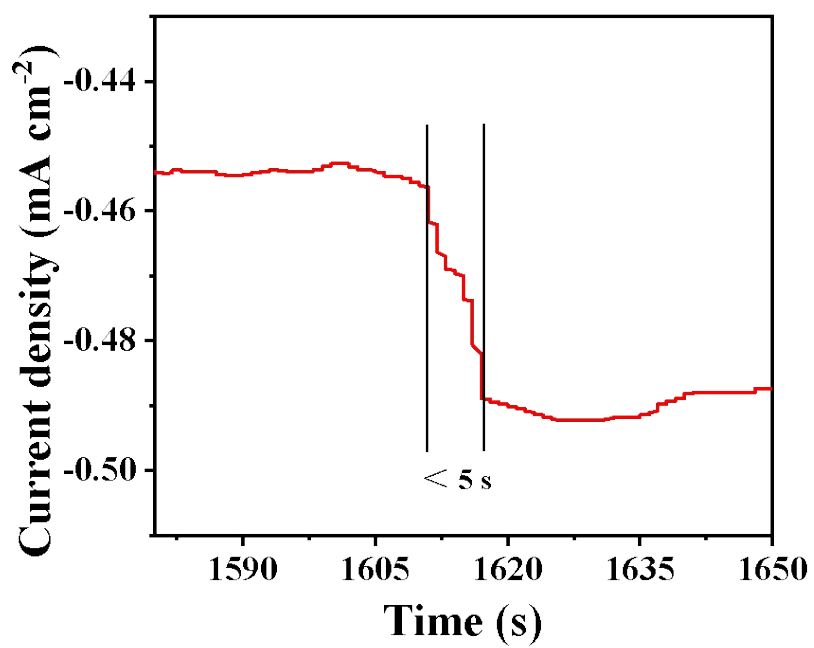

**Fig. S15** Response time to H<sub>2</sub>O<sub>2</sub> reduction of NiCo LDH/NiCoS/CC electrode.
